# Supplementary material for: Computational design and exploitation of bulk and surface molecularly imprinted polymers for removal of simmondsin from Simmondsia chinensis residual seeds
Source: Royal Society of Chemistry journal article supplement (doi:10.1039/d5ra08130k), 2025-01-01
Supplement: d5ra08130k1.pdf [file d5ra08130k1.pdf]

Supplementary Figures

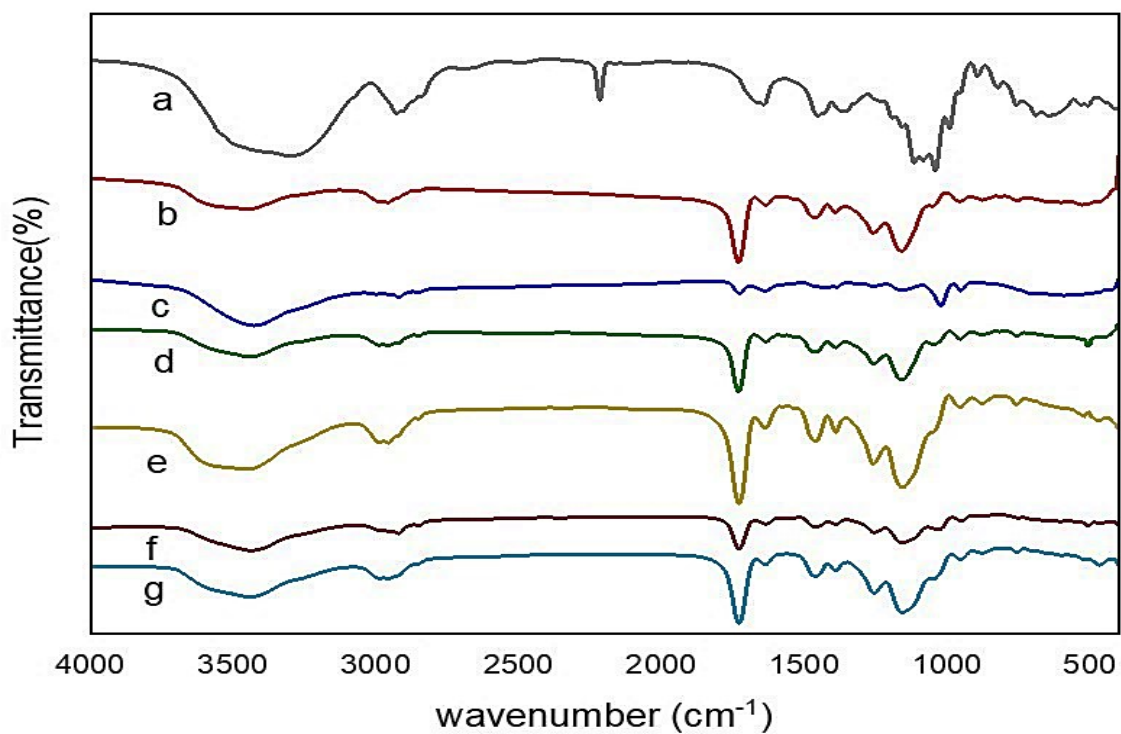

**Fig S1:** FTIR spectra of (a) SIMM, (b) MIP(B) un wash, (c) MIP (B)washed, (d) NIP (B), (e) MIP(S) un wash, (f) MIP(S) washed, and (g) NIP(S).

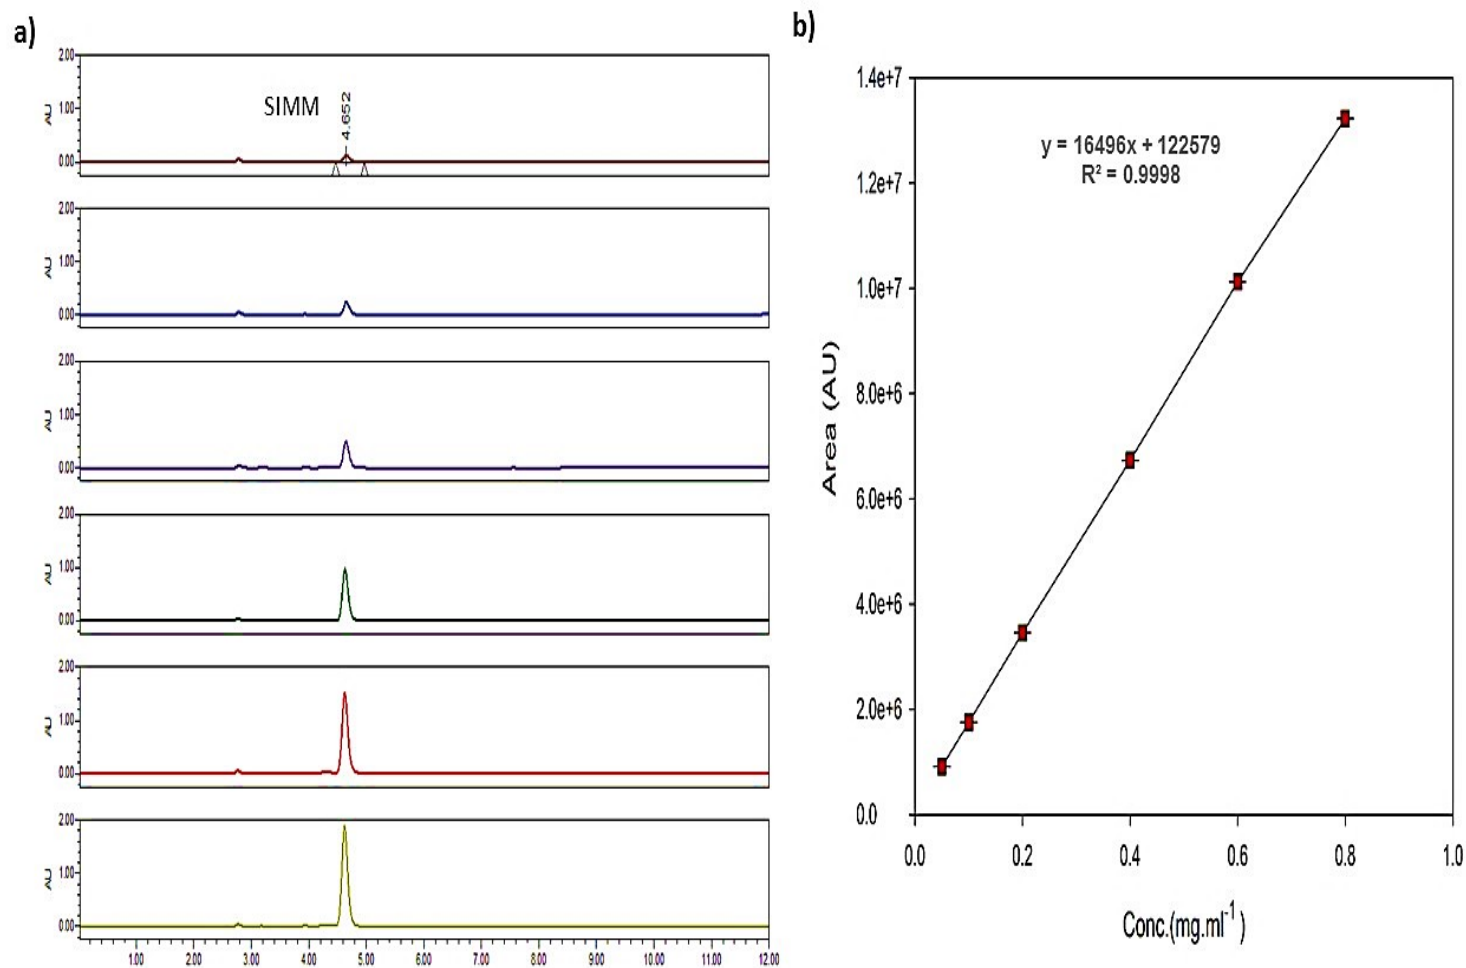

**Fig S2:** a) linearity chromatograms of SIMM, b) linearity graph plotted range conc of SIMM (0.05mg/ml to 0.8mg/ml on x axis and response area on y axis
